# Supplementary material
Source: PubMed Central journal article supplement (PMC4249292)
Supplement: IAI.02083-14_zii999090983so1.pdf [file IAI.02083-14_zii999090983so1.pdf]

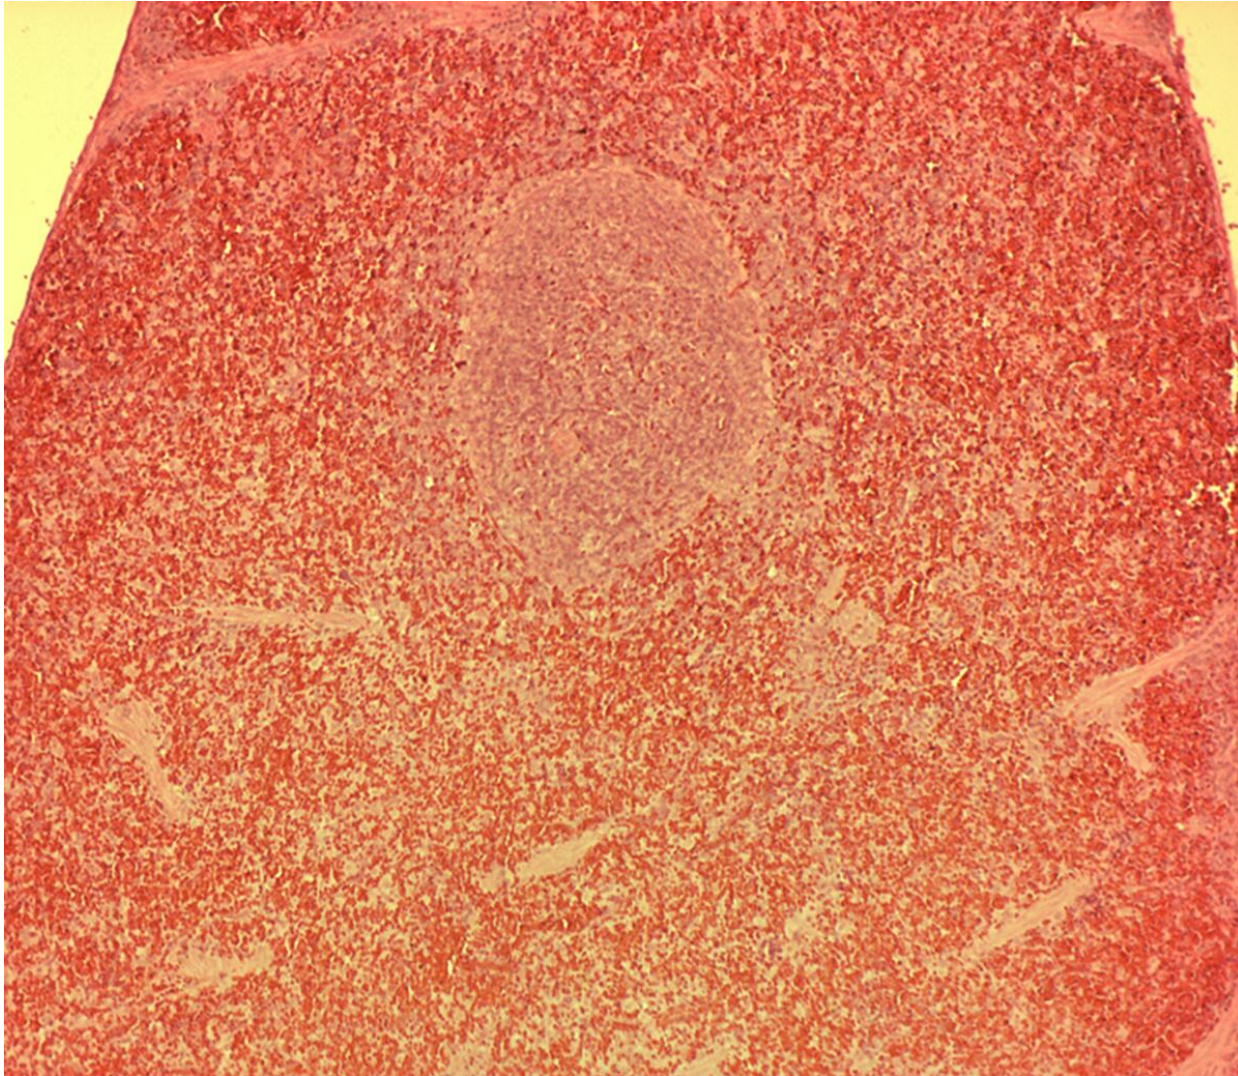

**Figure S1:** Photomicrograph of a spleen from a  $10^4$  *Leishmania (Viannia) braziliensis* infected animal showing normal architecture of the spleen compatible with uninfected animals (Hematoxylin and Eosin, 10X).
